# Supplementary material for: Fallopian Tube Basal Stem Cells Reproducing the Epithelial Sheets In Vitro—Stem Cell of Fallopian Epithelium
Source: MDPI journal article supplement (doi:10.3390/biom10091270), 2020-09-03
Supplement: s1 [file s1]

## Supplementary figure 1 Identification of primary FTECs.

**Pax 8**

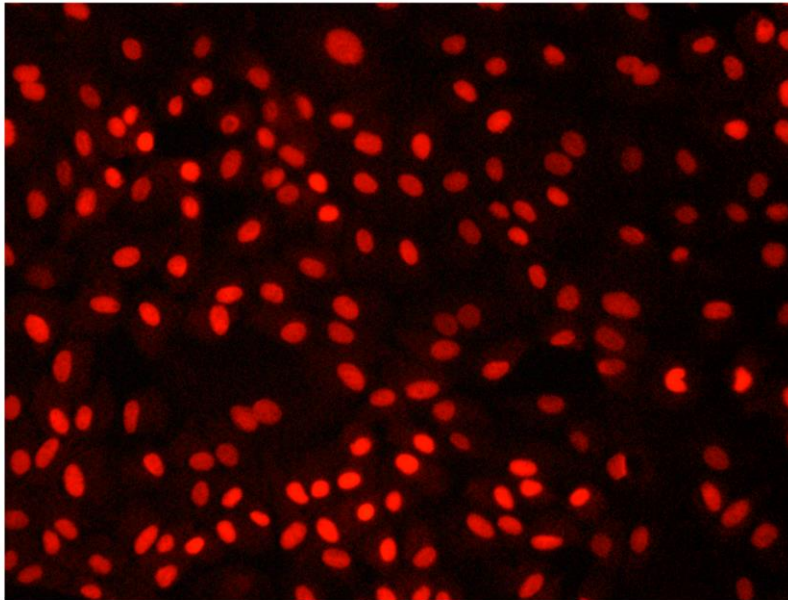

**Merge**

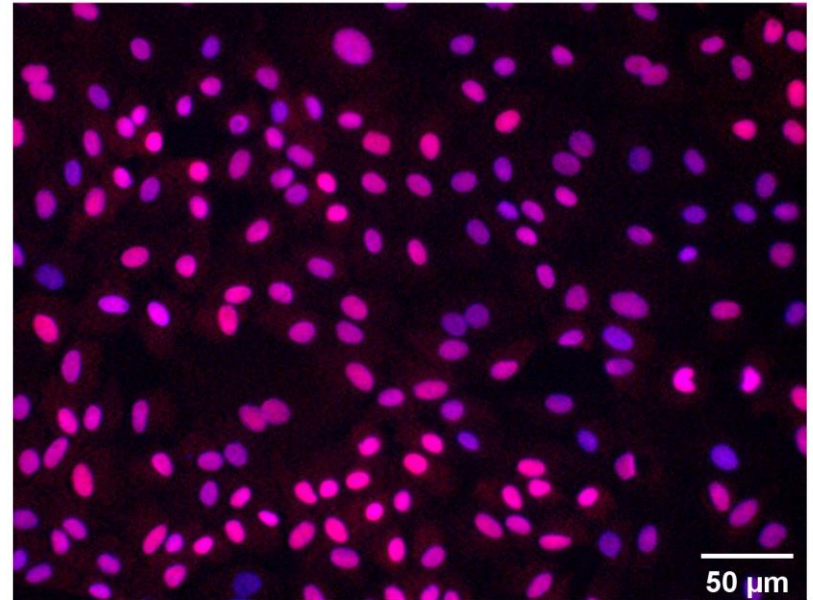

Primary FTECs were stained with Pax8, and DAPI Scale bar: 50 μm.

## **Supplementary figure 2 Purification of FTECs co-cultured with MEFs**

**FTECs co-cultured with MEFs**

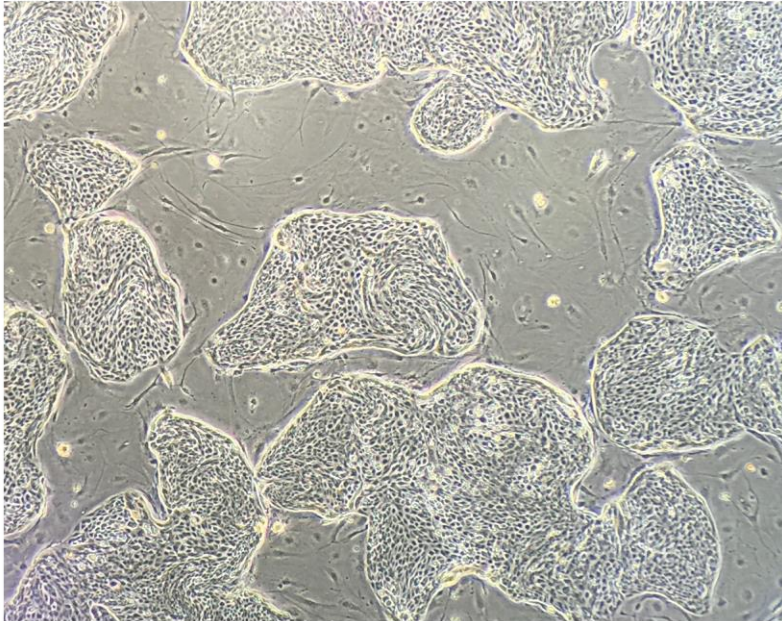

**Remove MEFs by trypsin**

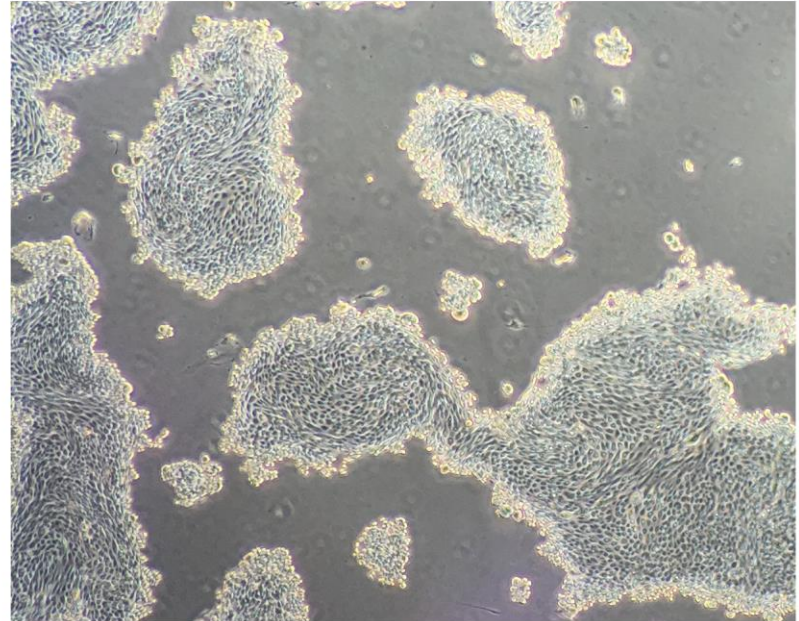

FTECs were co-cultured with MEFs for long-term expansion and MEFs were removed by differential trypsinization.
